# Supplementary material
Source: PubMed Central journal article supplement (PMC6528478)
Supplement: NIHMS1027070-supplement-SI.pdf [file NIHMS1027070-supplement-SI.pdf]

## Supplemental Information

### Anti-Biofilm Activity of Graphene Quantum Dots via Self-Assembly with Bacterial Amyloid Proteins

Yichun Wang<sup>†, ‡</sup>, Usha Kadiyala<sup>§</sup>, Zhibei Qu<sup>†, ‡</sup>, Paolo Elvati<sup>⊥</sup>, Christopher Althelm<sup>§</sup>,  
Nicholas A. Kotov<sup>†, ‡, ||, ¶, #, □</sup>, Angela Violi<sup>†, ⊥, ¶, ○, \*</sup> and J. Scott VanEpps<sup>§, ||, ‡, □, #, \*</sup>

<sup>†</sup> Department of Chemical Engineering, Ann Arbor, MI 48109 USA

<sup>‡</sup> Biointerfaces Institute University of Michigan, Ann Arbor, MI 48109 USA

<sup>§</sup> Department of Emergency Medicine, Ann Arbor, MI 48109 USA

<sup>⊥</sup> Department of Mechanical Engineering, Ann Arbor, MI 48109 USA

<sup>||</sup> Department of Biomedical Engineering, Ann Arbor, MI 48109 USA

<sup>¶</sup> Department of Materials Science and Engineering, Ann Arbor, MI 48109 USA

<sup>#</sup> Department of Macromolecular Science and Engineering, Ann Arbor, MI 48109 USA

<sup>□</sup> Michigan Center for Integrative Research in Critical Care, Ann Arbor, MI 48109 USA

<sup>○</sup> Biophysics Program, University of Michigan, Ann Arbor, MI 48109 USA

\*Correspondence: [avioli@umich.edu](mailto:avioli@umich.edu), [jvane@med.umich.edu](mailto:jvane@med.umich.edu)

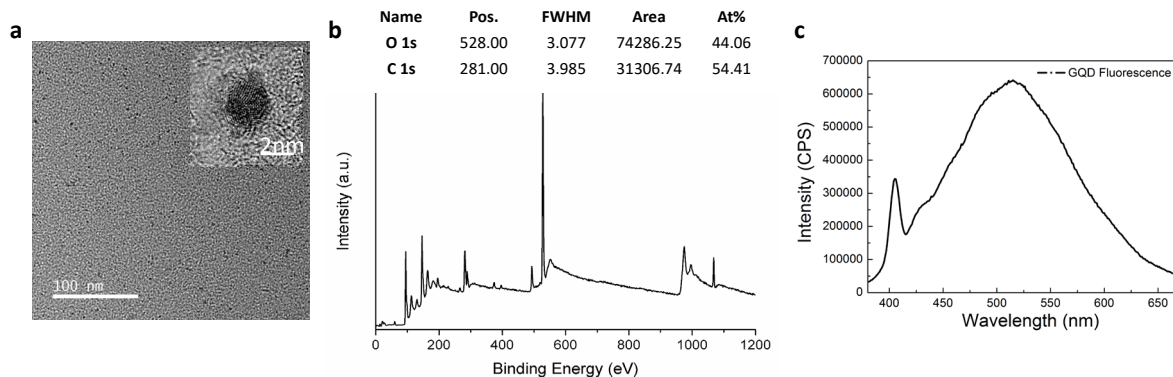

**Figure S1 Characterization of as synthesized GQDs. (a)** TEM images of GQDs as synthesized **(b)** X-ray photoelectron spectroscopy (XPS) of GQDs **(c)** Fluorescence of GQD excited by 350 nm photons.

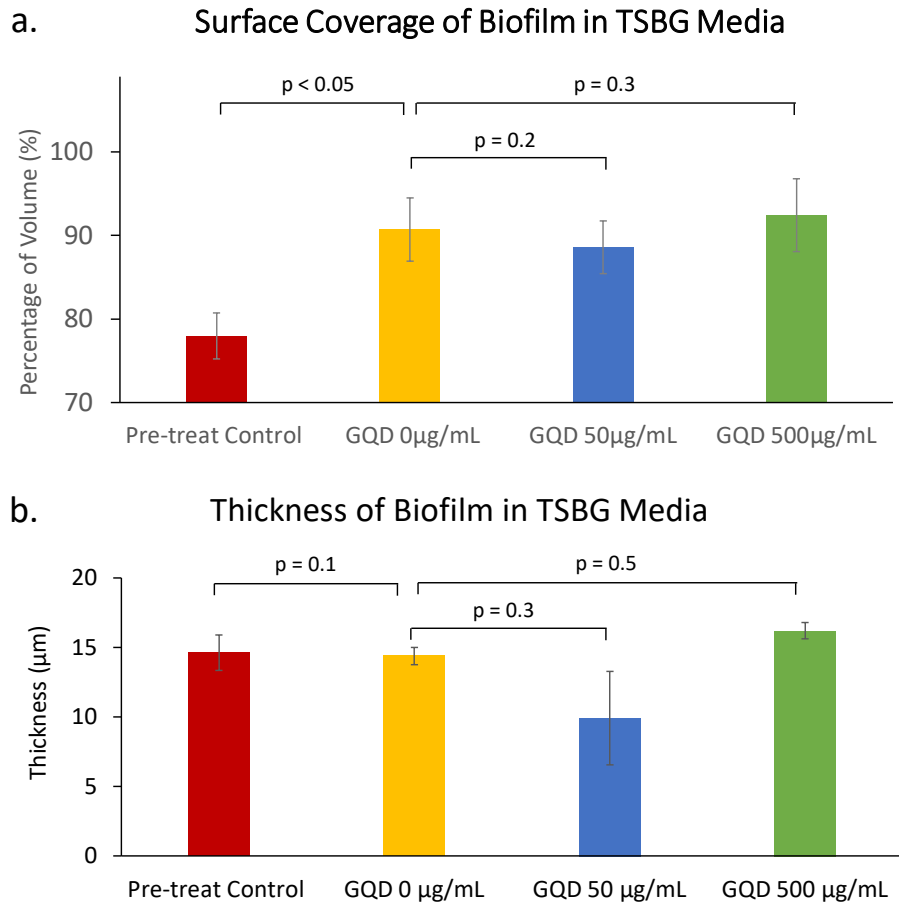

**Figure S2 Quantitative image analysis derived from confocal microscopy of TSBG grown *S. aureus* biofilms.** (a) Surface coverage of biofilm grown in TSBG medium as control as well as treated with 0 µg/mL, 50 µg/mL, and 500 µg/mL GQDs. (b) Thickness of TSBG grown biofilm as control as well as treated with 0 µg/mL, 50 µg/mL, and 500 µg/mL GQDs. Pre-treat control group represent the biofilm at the time before adding GQDs.

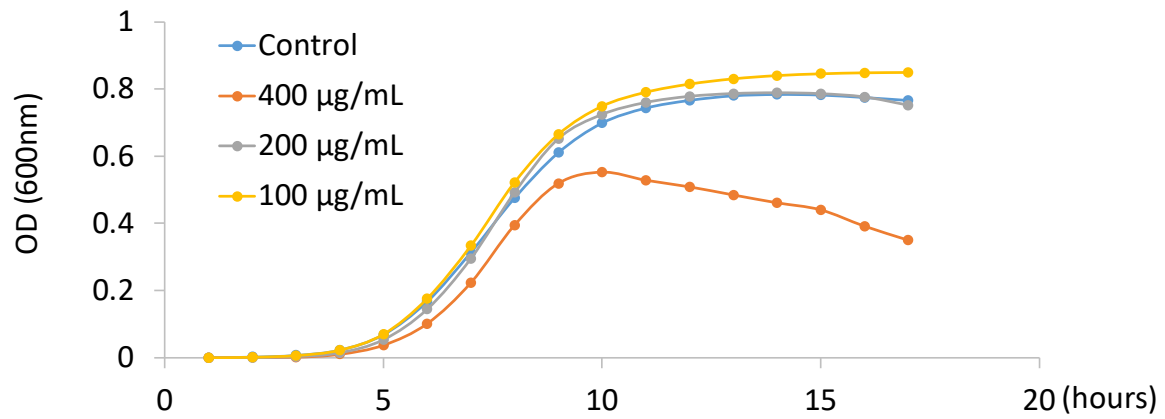

**Figure S3 Planktonic growth curve for *S. aureus* in the presence of increasing concentrations of GQDs.**

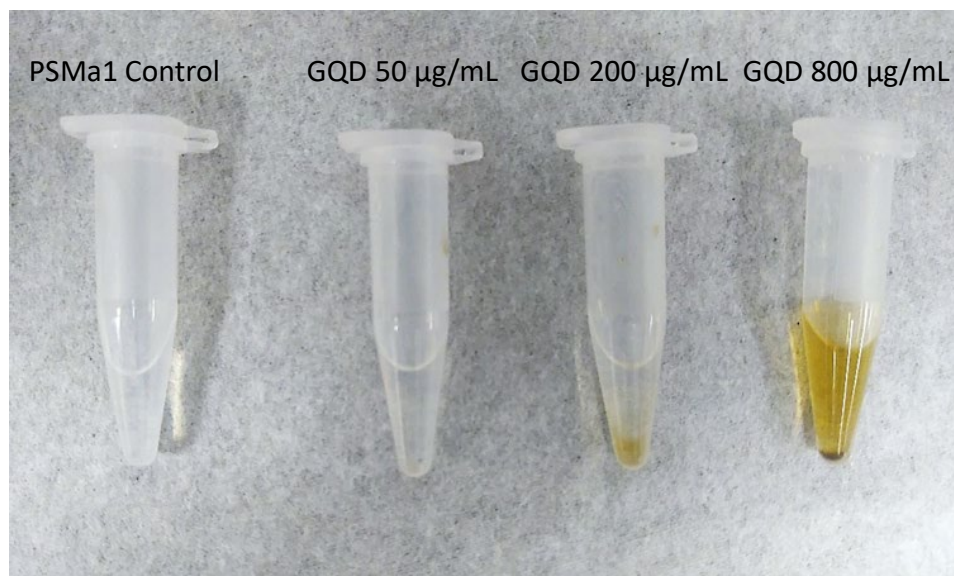

**Figure S4 The photo of PSMα1 with/without addition of 50, 200, 800 µg/mL GQDs for 9 days.**

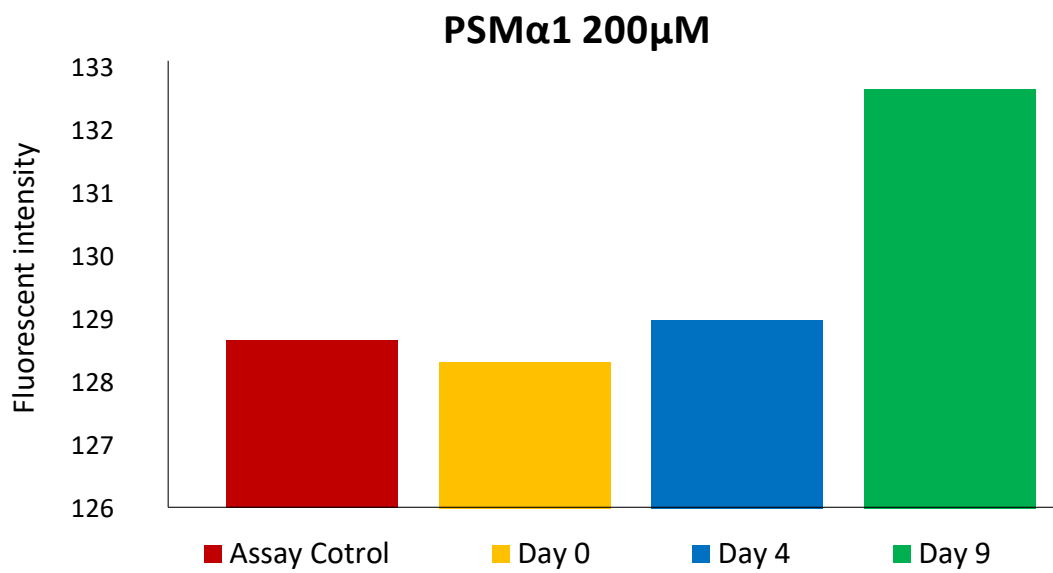

**Figure S5 ThT staining of PSM $\alpha$ 1 after incubation for 0, 4 and 9 days.**

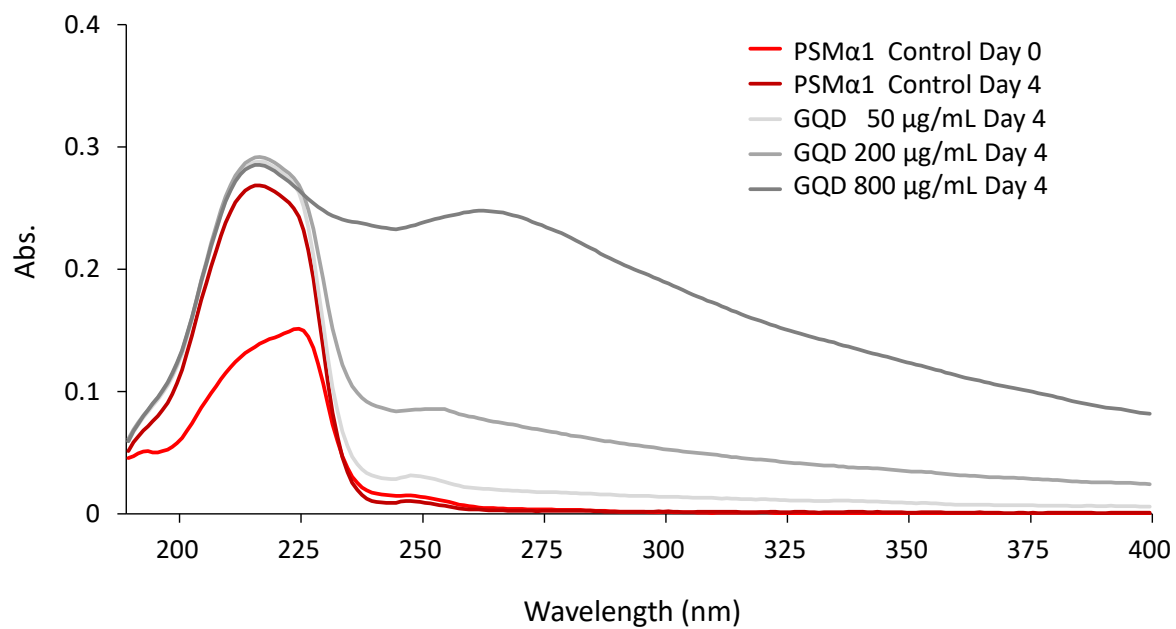

**Figure S6 Absorption spectra of 200 μM PSMα1 with or without GQDs (50, 200, 800 μg/mL) for 0 and 4 days.** The measured solution was diluted by 10 times of original incubated solution.

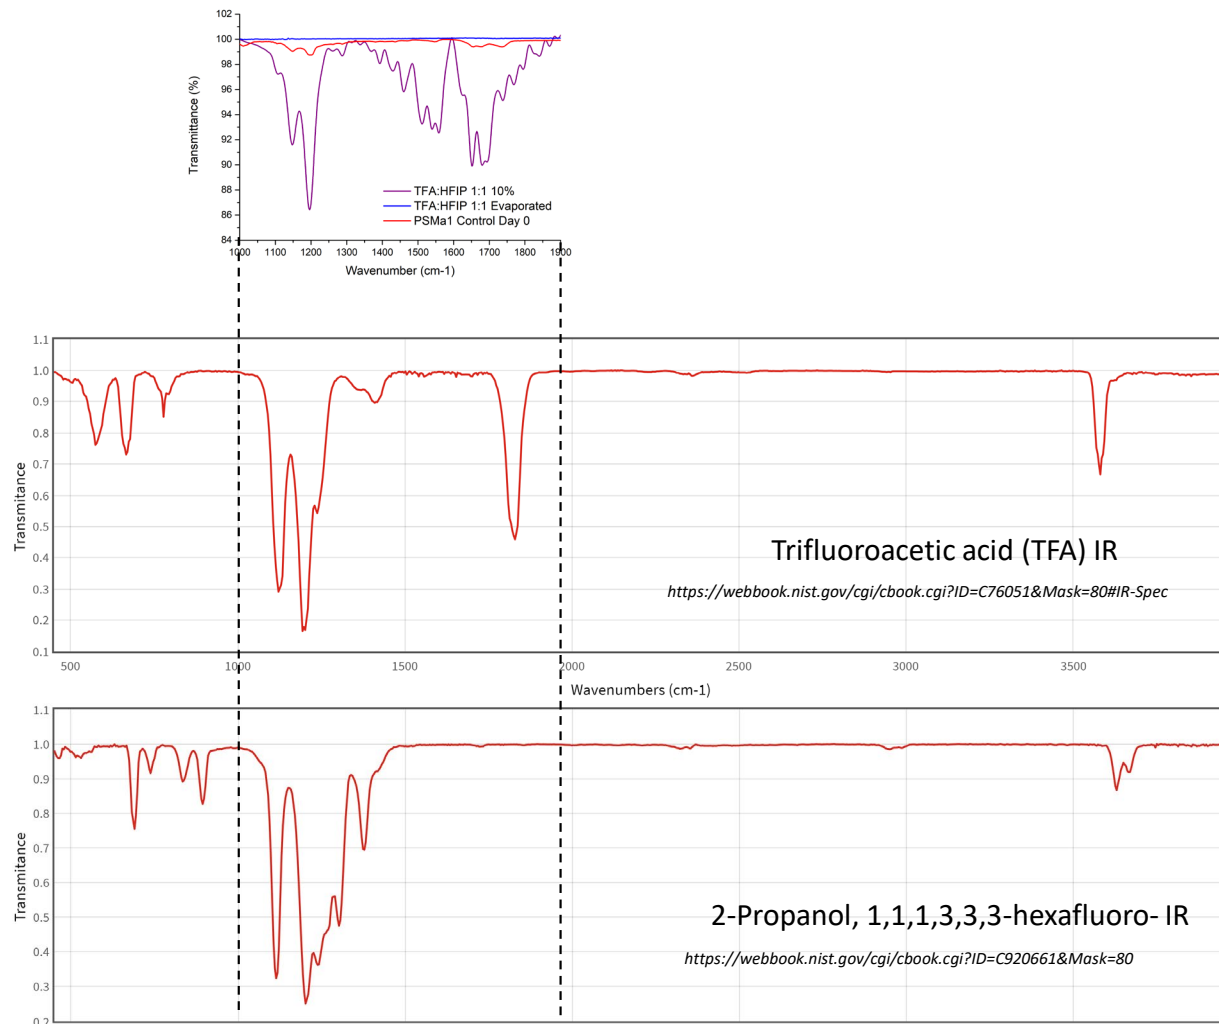

**Figure S7** FTIR of TFA and HFIP control solution comparing to their reference spectra and the spectrum of PSMα1 control sample on Day 0.
